# Supplementary material
Source: PubMed Central journal article supplement (PMC5771971)
Supplement: NIHMS904677-supplement-Supplemental_File.pdf [file NIHMS904677-supplement-Supplemental_File.pdf]

**Figure S1.** Study cohort diagram. \*23 women were not sampled due to resources constraints. Abbreviations: LMP, last menstrual period; SAB, spontaneous abortion.

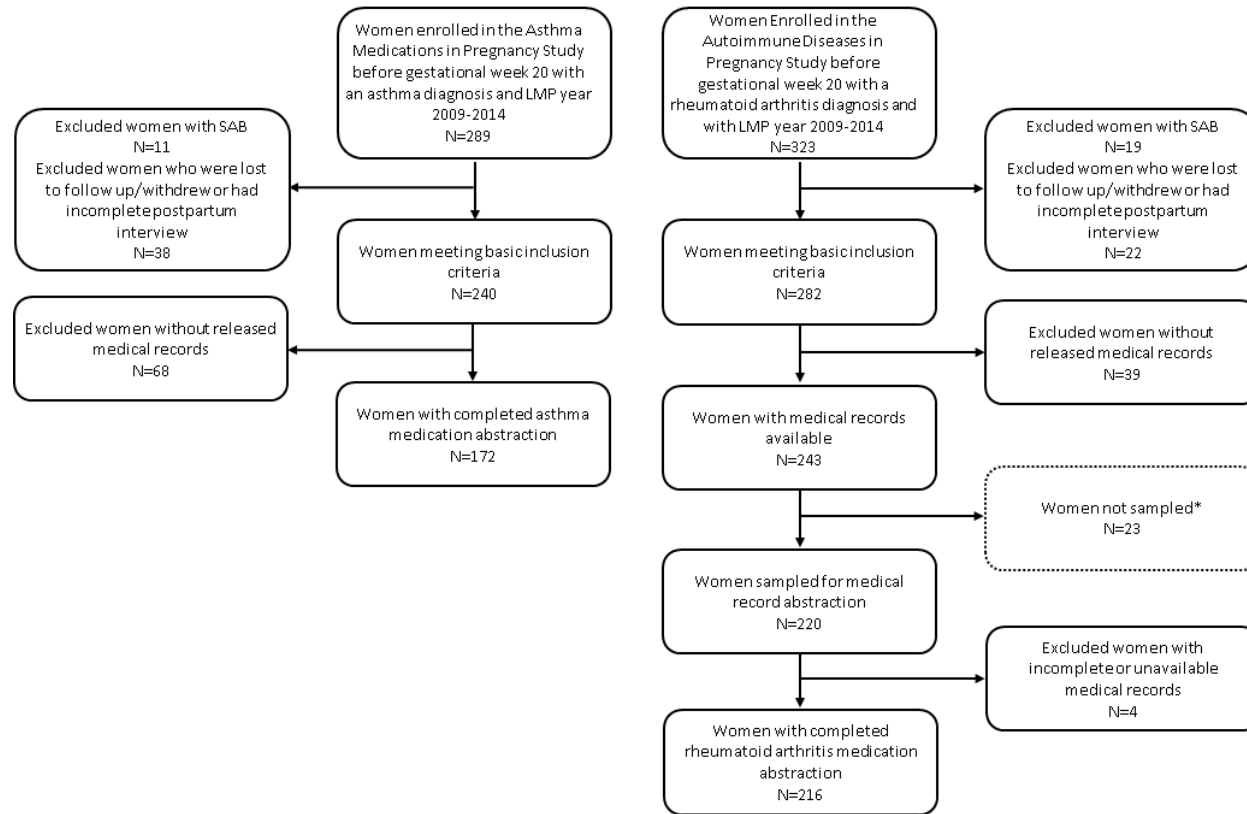

**Table S1.** Agreement between maternal report and medical record for rheumatoid arthritis and asthma medications, according to second and third trimester.

| Medication                         | K (95% CI)         | Second Trimester         |                                      |                                     | Third Trimester      |                          |                                      |                                     |
|------------------------------------|--------------------|--------------------------|--------------------------------------|-------------------------------------|----------------------|--------------------------|--------------------------------------|-------------------------------------|
|                                    |                    | % Agreement <sup>a</sup> | Maternal Report Only, n <sup>b</sup> | Medical Record Only, n <sup>c</sup> | K (95% CI)           | % Agreement <sup>a</sup> | Maternal Report Only, n <sup>b</sup> | Medical Record Only, n <sup>c</sup> |
| <b>Rheumatoid Arthritis, n=216</b> |                    |                          |                                      |                                     |                      |                          |                                      |                                     |
| Prednisone                         | 0.22 (0.08, 0.37)  | 73.1                     | 32                                   | 26                                  | 0.23 (0.08, 0.39)    | 75.9                     | 22                                   | 30                                  |
| Hydroxychloroquine                 | 0.24 (0.07, 0.41)  | 87.5                     | 0                                    | 27                                  | 0.10 (-0.03, 0.23)   | 86.1                     | 0                                    | 30                                  |
| Sulfasalazine                      | 0.19 (-0.13, 0.52) | 96.3                     | 0                                    | 8                                   | 0.39 (0.01, 0.77)    | 97.2                     | 0                                    | 6                                   |
| Adalimumab                         | 0.15 (-0.03, 0.33) | 90.3                     | 0                                    | 21                                  | 0.40 (0.16, 0.63)    | 92.6                     | 2                                    | 14                                  |
| Etanercept                         | 0.37 (0.22, 0.52)  | 81.5                     | 5                                    | 35                                  | 0.21 (0.05, 0.36)    | 82.4                     | 4                                    | 34                                  |
| Ibuprofen                          | 0.35 (-0.02, 0.72) | 96.8                     | 3                                    | 4                                   | -0.01 (-0.02, 0.01)  | 94.9                     | 1                                    | 10                                  |
| Aspirin <sup>d</sup>               | 0.12 (-0.14, 0.37) | 94.4                     | 4                                    | 8                                   | -                    | 96.3                     | 0                                    | 8                                   |
| <b>Asthma, n=172</b>               |                    |                          |                                      |                                     |                      |                          |                                      |                                     |
| Prednisone                         | 0.53 (0.25, 0.82)  | 95.3                     | 5                                    | 3                                   | 0.47 (0.19, 0.75)    | 94.2                     | 4                                    | 6                                   |
| Fluticasone                        | 0.74 (0.40, 1.00)  | 98.8                     | 2                                    | 0                                   | -0.02 (-0.04, -0.01) | 95.3                     | 4                                    | 4                                   |
| Budesonide                         | 0.37 (0.05, 0.69)  | 94.8                     | 6                                    | 3                                   | 0.41 (0.09, 0.73)    | 95.3                     | 0                                    | 8                                   |
| Fluticasone/salmeterol             | 0.19 (-0.01, 0.40) | 84.9                     | 12                                   | 14                                  | 0.26 (0.05, 0.47)    | 87.2                     | 3                                    | 19                                  |
| Budesonide/formoterol              | 0.30 (0.01, 0.59)  | 93.0                     | 6                                    | 6                                   | 0.24 (-0.05, 0.54)   | 93.6                     | 2                                    | 9                                   |
| Albuterol                          | 0.15 (0.00, 0.31)  | 66.3                     | 32                                   | 26                                  | 0.10 (-0.05, 0.25)   | 66.9                     | 17                                   | 40                                  |
| Montelukast <sup>d</sup>           | 0.11 (-0.12, 0.34) | 92.4                     | 2                                    | 11                                  | -                    | 93.6                     | 11                                   | 0                                   |

Abbreviation: K, kappa; CI, confidence interval.

<sup>a</sup>The number of women who reported the medication and had the medication in any of their medical records plus the number of women who did not report the medication and did not have the medication in any of their medical records divided by the total number of women.

<sup>b</sup>The number of women who reported the medication but did not have the medication in any of their medical records.

<sup>c</sup>The number of women with the medication in any of their medical records who did not report the medication.

<sup>d</sup>No women reported use of the medication during the third trimester.

**Table S2.** Agreement between maternal report and medical record for rheumatoid arthritis, according to time period, among women with rheumatoid arthritis with both obstetrician and rheumatologist records available (n=154).

| Medication         | Anytime During Pregnancy           |                                      | 1st Trimester                      |                                      |
|--------------------|------------------------------------|--------------------------------------|------------------------------------|--------------------------------------|
|                    | Obstetrician Records<br>K (95% CI) | Rheumatologist Records<br>K (95% CI) | Obstetrician Records<br>K (95% CI) | Rheumatologist Records<br>K (95% CI) |
| Prednisone         | 0.35 (0.24, 0.46)                  | 0.24 (0.12, 0.37)                    | 0.24 (0.12, 0.37)                  | 0.14 (0.02, 0.25)                    |
| Hydroxychloroquine | 0.83 (0.73, 0.94)                  | 0.84 (0.74, 0.94)                    | 0.59 (0.42, 0.77)                  | 0.54 (0.36, 0.72)                    |
| Sulfasalazine      | 0.55 (0.29, 0.80)                  | 0.85 (0.71, 0.99)                    | 0.61 (0.32, 0.89)                  | 0.50 (0.21, 0.78)                    |
| Adalimumab         | 0.84 (0.72, 0.96)                  | 0.74 (0.59, 0.90)                    | 0.68 (0.48, 0.87)                  | 0.54 (0.31, 0.76)                    |
| Etanercept         | 0.81 (0.71, 0.90)                  | 0.88 (0.80, 0.96)                    | 0.56 (0.42, 0.70)                  | 0.58 (0.44, 0.72)                    |
| Ibuprofen          | 0.26 (0.06, 0.47)                  | 0.22 (0.02, 0.41)                    | 0.28 (0.04, 0.51)                  | 0.12 (-0.08, 0.32)                   |
| Aspirin            | 0.27 (0.06, 0.48)                  | 0.40 (0.19, 0.61)                    | 0.09 (-0.08, 0.27)                 | 0.15 (-0.06, 0.36)                   |

Abbreviation: K, kappa; CI, confidence interval.
